# Supplementary material for: Web3DMol: interactive protein structure visualization based on WebGL
Source: PubMed Central journal article supplement — Nucleic Acids Res. 2017 May 8;45(Web Server issue):W523–7. doi: 10.1093/nar/gkx383 (PMC5570197; doi:10.1093/nar/gkx383), 2017-05-08
Supplement: gkx383_Supp.pdf [file gkx383_Supp.pdf]

## Web3DMol: interactive protein structure visualization based on WebGL

### SUPPLEMENTARY

**Table S1.** Requirement for web browsers to run Web3DMol

| Web Browser         | Support Version | Support Since |
|---------------------|-----------------|---------------|
| Chrome              | 8.0+            | Dec 02, 2010  |
| Firefox             | 4.0+            | Mar 22, 2011  |
| Safari              | 5.1+            | Jul 20, 2011  |
| Opera               | 12.1+           | Nov 05, 2012  |
| Internet Explorer   | Edge            | Jul 29, 2015  |
| iOS Safari          | 8.0+            | Sep 17, 2014  |
| Opera Mini          | Not Supported   | -             |
| Opera Mobile        | 37+             | Sep 23, 2016  |
| Android WebView     | Chromium 56+    | Feb 01, 2017  |
| Chrome for Android  | 57+             | Mar 27, 2017  |
| Firefox for Android | 52+             | Mar 27, 2017  |

**A**

```
<iframe src="http://web3dmol.duapp.com/?id=5en9&widget=0"
frameborder=0 width=800 height=500 allowfullscreen></iframe>
```

**B**

```
<script type="text/javascript"
src="http://web3dmol.duapp.com/lib/web3dmol.js"></script>
<script type="text/javascript">
var config = {
  rep_mode_main : 113,
  rep_mode_het : 100,
  bg : [ 0.78, 0.78, 0.78 ],
  fog_color : [ 0.78, 0.78, 0.78 ],
  fog_mode : 2,
  fog_density : 0.7,
  fog_start : 5.0,
  fog_stop : 25.0,
  geom_mol_size : 11.0
};
var color = {
  101 : [ 0.32, 0.32, 0.32 ],
  102 : [ 0.8, 0.8, 0.8 ]
};
w3m.api.init('container', '5en9', 0, config, color);
</script>
```

**Figure S1.** Examples of Web3DMol reuse and extension. (A) Using HTML. (B) Using JavaScript.
